# Supplementary material for: Induced pluripotent stem cell-derived endothelial cells promote angiogenesis and accelerate wound closure in a murine excisional wound healing model
Source: PubMed Central journal article supplement (PMC6066657; doi:10.1042/bsr20180563), 2018-07-31

552 Supplementary figure 1. Generation of induced pluripotent stem (iPSCs) and induced  
553 pluripotent stem cell derived endothelial cells (iPSC-ECs) from dermal fibroblasts was  
554 achieved by retroviral overexpression of Oct4, Sox2, Klf4 and cMyc, followed by culture in  
555 endothelial lineage specific growth factors.

556

**Dermal fibroblasts**

**Induced Pluripotency**

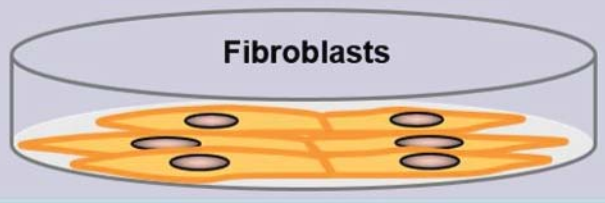

**Reprogramming (14 days)**

**INTEGRATING VECTORS**

- Retrovirus (OKSM)

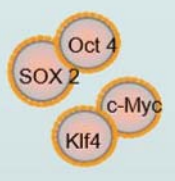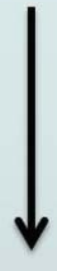

**Induced pluripotent stem cells (iPSCs)**

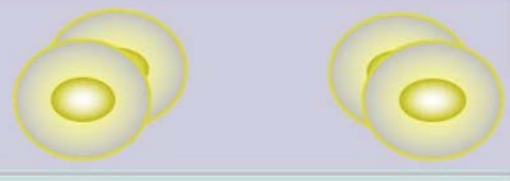

**Differentiation (14 days)**

**Differentiation media:**

- VEGF
- bFGF
- BMP4

**Endothelial growth medium**

**Lentivirus LV-pUb-Fluc-GFP**

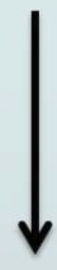

**Endothelial cells**

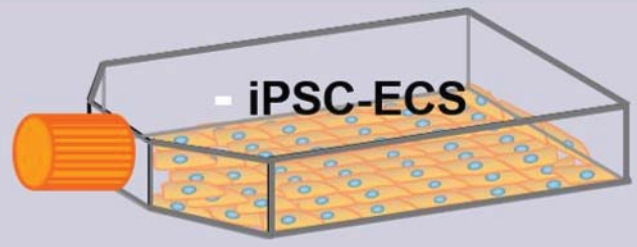

Supplement: bsr20180563_Supp1.pdf [file bsr20180563_Supp1.pdf]
